# Supplementary material for: A zinc-conducting chalcogenide electrolyte
Source: PubMed Central journal article supplement — Sci Adv. 2023 Jan 27;9(4):eade2217. doi: 10.1126/sciadv.ade2217 (PMC9882973; doi:10.1126/sciadv.ade2217), 2023-01-27
Supplement: sciadv.ade2217_sm.pdf [file sciadv.ade2217_sm.pdf]

Supplementary Materials for  
**A zinc-conducting chalcogenide electrolyte**

Jian Zhi *et al.*

Corresponding author: Fuqiang Huang, [huangfq@mail.sic.ac.cn](mailto:huangfq@mail.sic.ac.cn)

*Sci. Adv.* **9**, eade2217 (2023)  
DOI: 10.1126/sciadv.ade2217

**This PDF file includes:**

Discussions S1 to S4  
Figs. S1 to S40  
Tables S1 to S8

## Supplementary Discussion 1: Density functional theory (DFT) calculations

Density functional theory (DFT) calculations were conducted employing Vienna Ab-initio Simulation Package (VASP). Perdew-Burke-Ernzerhof (PBE) parameterization of the generalized gradient approximation (GGA) and Ultra-soft (US) pseudopotentials are used for the core-valence electron interaction. The cut-off energy was set as 600 eV. Derived from cubic ZnS, the cell with [1 1 1] as *c*-axis was selected for further optimization with a  $6 \times 6 \times 2$  Monkhorst-Pack K-point grid. For F-doped ZnS, a  $3 \times 3 \times 1$  supercell was established with a S atom substituted by a F atom and coupled Zn vacancy. A  $2 \times 2 \times 1$  K-point grid was used. The Zn-ion probability densities were calculated based on the method of Ceder *et al.* Canonical ensemble was selected with a timestep of 2 fs and 10, 000 steps at 900 K. All the tetrahedral and octahedral sites were filled with Zn atoms in the ZnS and F-doped ZnS model. The probability densities were visualized by python materials genomics (Pymatgen).

DFT was also applied to determine the formation energies of various defects in ZnS. Python Charged Defect Toolkit (PyCDT) package was employed to determine the defect formation energy:

$$E^f[X^q] = E_{tot}[X^q] - E_{tot}[bulk] - \sum_i n_i \mu_i + qE_F + E_{corr} \quad (1)$$

Here,  $E_{tot}[X^q]$  and  $E_{tot}[bulk]$  are the total simulation energy.  $\mu_i$  and  $n_i$  are the chemical potential and number of species *i*, respectively, and  $qE_F$  represents the defect charge multiplied by the Fermi energy at valence band maximum.  $E_{corr}$  represents a correction segment corresponding to errors from background charge. All calculations are based on a  $3 \times 3 \times 4$  supercell of ZnS structure, comprising a total of 278 atoms. The bulk phase was optimised with respect to lattice parameter and atomic positions using an energy cut-off of 600 eV and a  $2 \times 2 \times 2$  K-point mesh. The lattice geometry was fixed for all additional calculations. Diffusion barriers have been obtained via the climbing image nudged elastic band (NEB) method.

## Supplementary Discussion 2: Calculation of transference number

Lithium-ion transference number  $t_{Zn^{2+}}$  of Zn-MFZS solid electrolyte was estimated via combination measurements of AC impedance and potentiostatic DC polarization. The DC current as a function of time was measured for Zn/Zn-MFZS/Zn symmetric cells under 10 mV until a steady state was achieved after  $1 \times 10^4$  s. The cell was also monitored by AC impedance to determine the bulk resistance of Zn-MFZS and Zn-MFZS/Zn interface. The transference number,  $t_{Zn^{2+}}$  can thus be obtained by the following equation:

$$t_{Zn^{2+}} = \frac{I(\infty)R_{bulk}(\infty)[\Delta V - I(0)R_{int}(0)]}{I(0)R_{bulk}(0)[\Delta V - I(\infty)R_{int}(\infty)]} \quad (2)$$

where  $\Delta V$  represents polarization voltage,  $I$  represents the current,  $R_{bulk}$  and  $R_{int}$  are the resistance of the Zn-MFZS and the Zn-MFZS/Zn interface.

## Supplementary Discussion 3: Molecular dynamics (MD) simulations

MD simulations were performed in the DL\_POLY software. The simulation box contains a ZnS cell replicated  $12 \times 12 \times 18$  times to obtain a length of 75.24 Å in X–Y plane and 73.65 Å in Z-direction. To simulate pores, ZnS atoms were etched out to obtain a cylinder with a 4 nm (40 Å) in diameter along [010]. The model of porous ZnS contains 2052 atoms, among which there are 1026 Zn atoms and 1026 S atoms. Substitutional fluorine doping was simulated by replacing 57 S atoms with 57 F atoms in this porous ZnS system.  $Zn^{2+}$  insertion was realized by loading 10 Zn atoms and 220 OTF<sup>-</sup> groups in the cylindrical pore of the system, corresponding to a ZnS/Zn(OTF)<sub>2</sub> molar ratio of  $\approx 10:1$ . OTF<sup>-</sup> were simulated in the united atom formalism and comprised of one S site connected to three O site and one CF<sub>3</sub> site. 800 dimethylformamide (DMF) molecules

were also added to the simulation system to study the impact of residue DMF in  $Zn^{2+}$  conduction. Room temperature (298 K) with a pressure of 1 bar were retained during NPT (constant particle number, pressure and temperature) for 1.0 ns to obtain the density at this stage. Then we removed most DMF molecules to simulate the drying procedure with only 75 DMF molecules left in the system, which is in accordance with the residue DMF concentration as determined from ultrasonic-extraction based GC-MS method. 650 K was employed to accelerate the dynamics. All simulation runs for 6.0 ns were conducted at 650 K under an NVT ensemble employing Nose–Hoover thermostat to investigate the Zn-transport mechanism.  $Zn^{2+}$  inserted fluorine doped ZnS system without DMF was also simulated for comparison.

#### **Supplementary Discussion 4: Capacitance calculation**

The volumetric energy density ( $E_{vol}$ ) and power density ( $P_{vol}$ ) of the device are obtained from the following equations:

$$E_{vol} = \frac{1}{2} \times C_{vol} \times \frac{\Delta V^2}{3600} \quad (3)$$

$$P_{vol} = \frac{E_{vol}}{t} \quad (4)$$

$C_{vol}$  is the volumetric capacitance based the the total volume of solid ZIC, which is calculated from the galvanostatic charge–discharge curves according to the following equation:

$$C_{vol} = \frac{It}{V_T \Delta V} \quad (5)$$

where  $I$  is the charging current,  $t$  is the discharge time,  $V_T$  is the total volume of the solid ZIC device ( $0.6 \text{ cm}^3$ , including  $0.28 \text{ cm}^3$  NDFLC@Zn-MFZS,  $0.29 \text{ cm}^3$  Zn-MFZS and  $0.028 \text{ cm}^3$  Zn foil), and  $\Delta V$  is the voltage drop upon discharging.

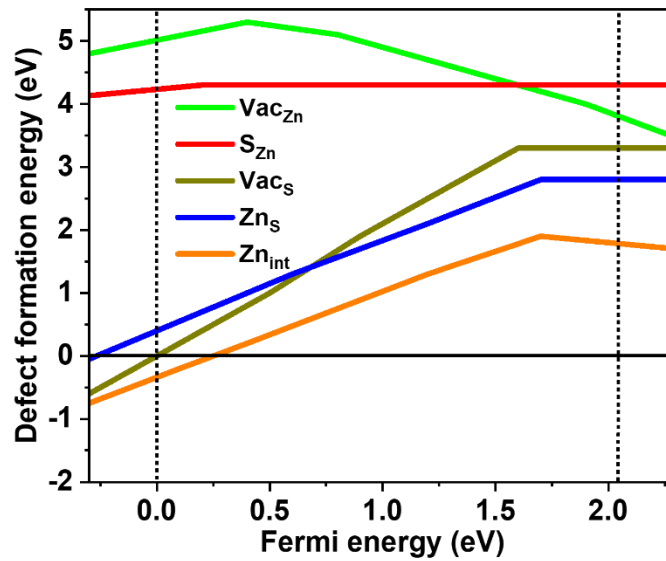

**Figure S1.** Formation energies of various defects in a  $3 \times 3 \times 4$  ZnS supercell. Vac<sub>Zn</sub> and Vac<sub>S</sub> are Zn and a S vacancy, respectively; Zn<sub>inter</sub> is an interstitial Zn atom, S<sub>Zn</sub> and Zn<sub>S</sub> are antisite defects with a S atom on a Zn and vice versa, respectively.

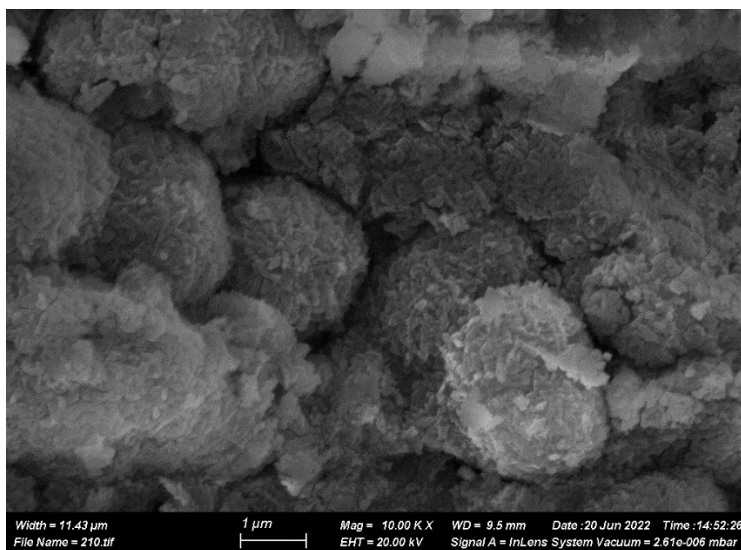

**Figure S2.** SEM image of MFZS sample.

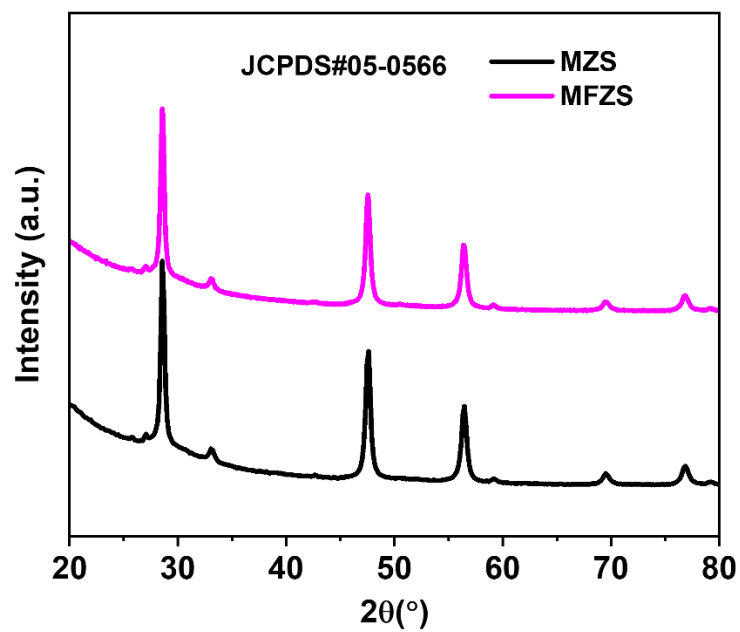

**Figure S3.** XRD patterns of MZS and MFZS samples

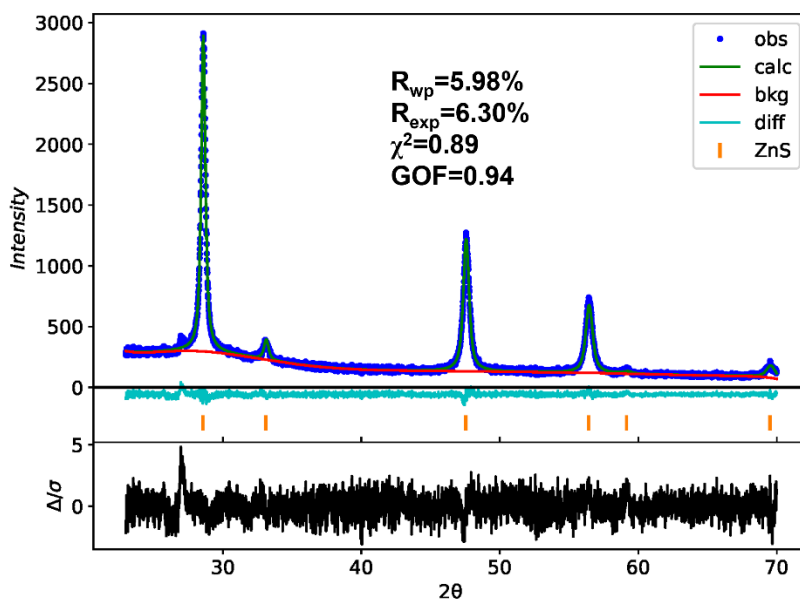

Figure S4. Rietveld refinement XRD spectra for MFZS (5.6 at% fluorine). The experimental XRD data (obs) are fitted with theoretical data (calc). The difference between the experimental and calculated intensities (diff) is plotted below the simulated pattern. “bkg” is the background model used for the Rietveld refinements. Black curves in the bottom represent the magnified difference (“diff” curves, light blue) between the measured and the calculated intensities.

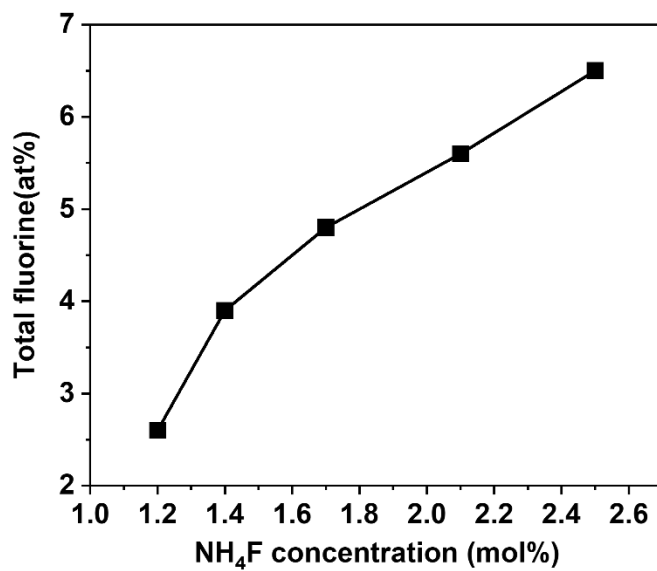

**Figure S5.** Correlation between  $\text{NH}_4\text{F}$  concentration in the initial EISA sol and total fluorine in MFZS samples

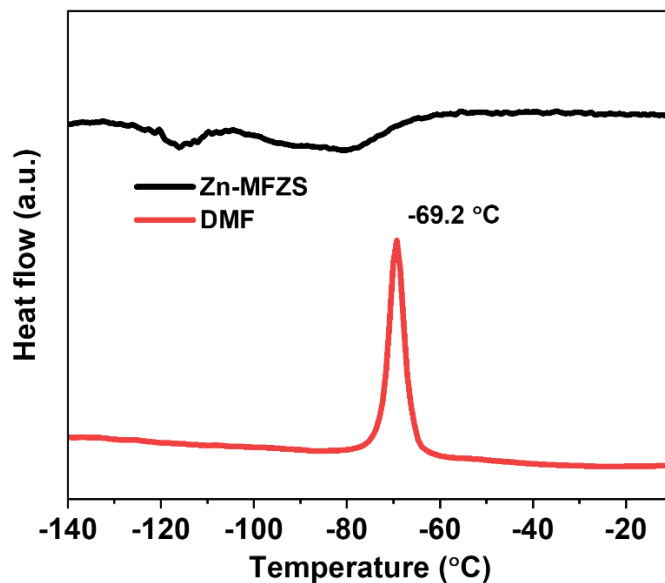

**Figure S6.** DSC for Zn-MFZS and pure DMF down to  $-140\text{ °C}$  (Hold for 10 minutes) at a rate of  $5\text{ °C min}^{-1}$  with simultaneous liquid nitrogen cooling and scanned from  $-140\text{ °C}$  to  $-10\text{ °C}$  at a rate of  $5\text{ °C min}^{-1}$

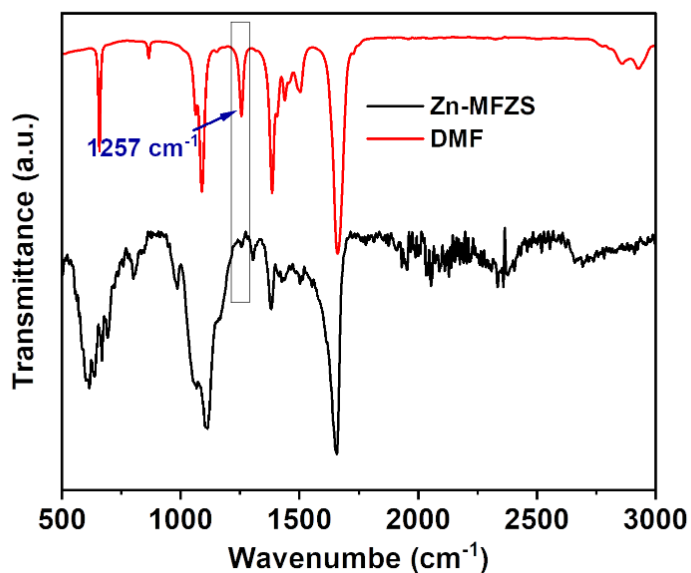



Figure S7. FTIR spectrum of Zn-MFZS and DMF

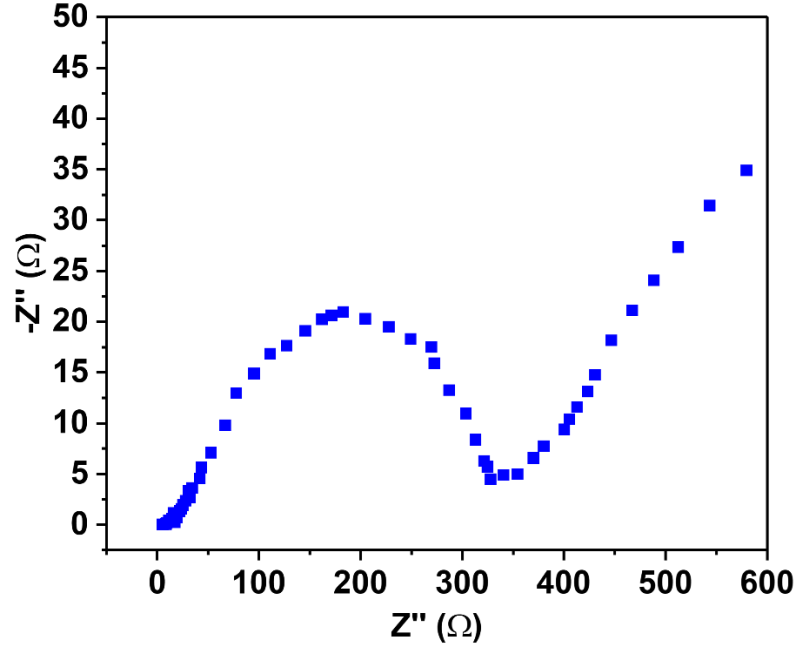

Figure S8. Nyquist of Zn-MFZS at 25 °C

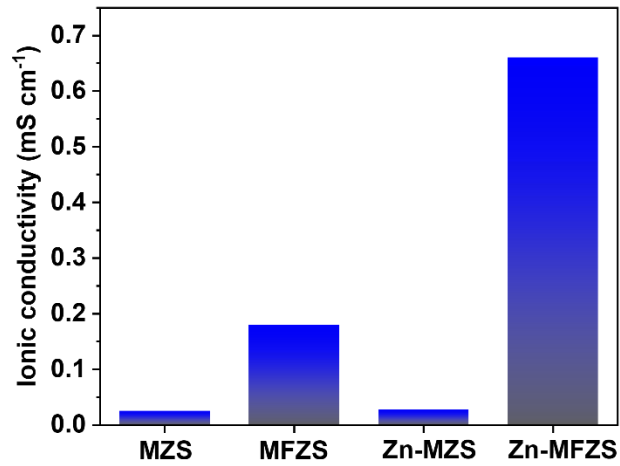

Figure S9. Ionic conductivity of MZS, MFZS, Zn-MZS and Zn-MFZS.

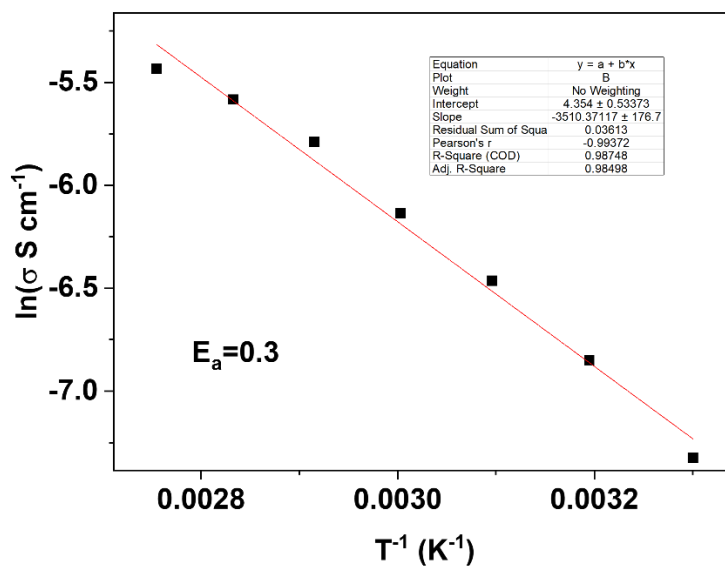

Figure S10. Details for the calculation of active energy for Zn-MFZS.

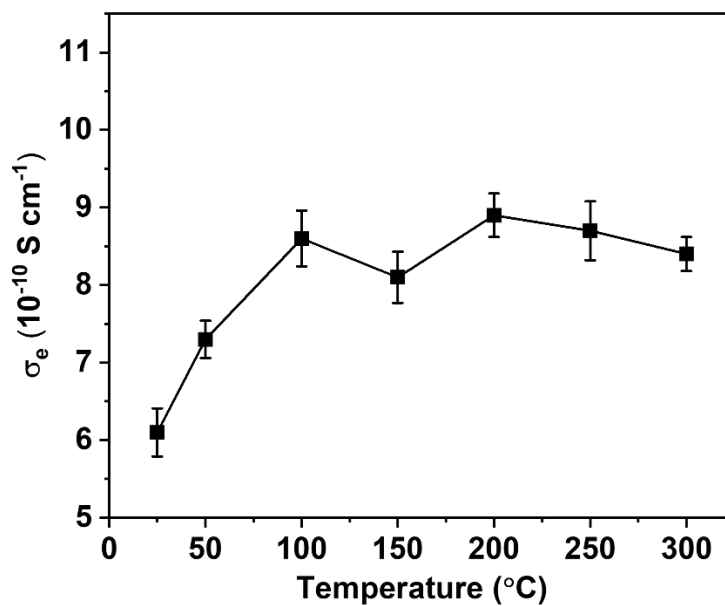

Figure S11. Electronic conductivity Zn-MFZS at 25-300  $^{\circ}\text{C}$ .

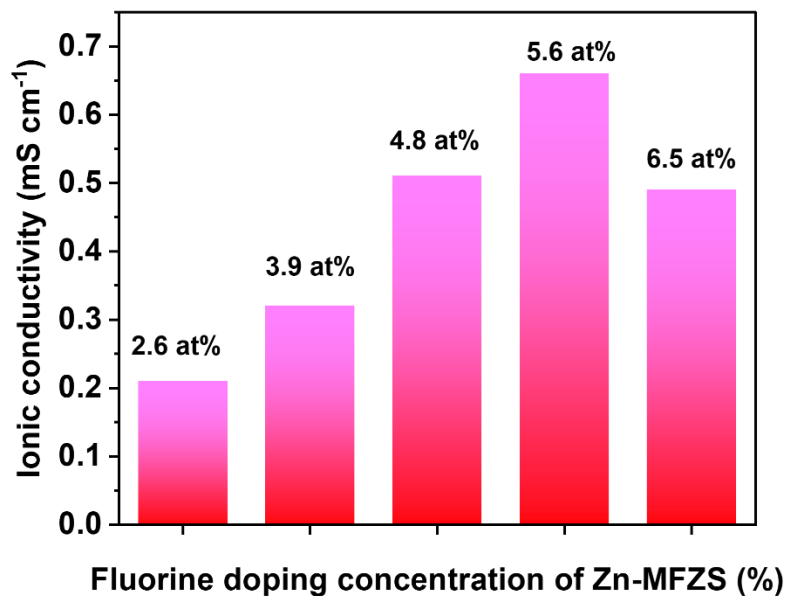

**Figure S12.** Ionic conductivity of Zn-MFZS with different fluorine doping concentrations.

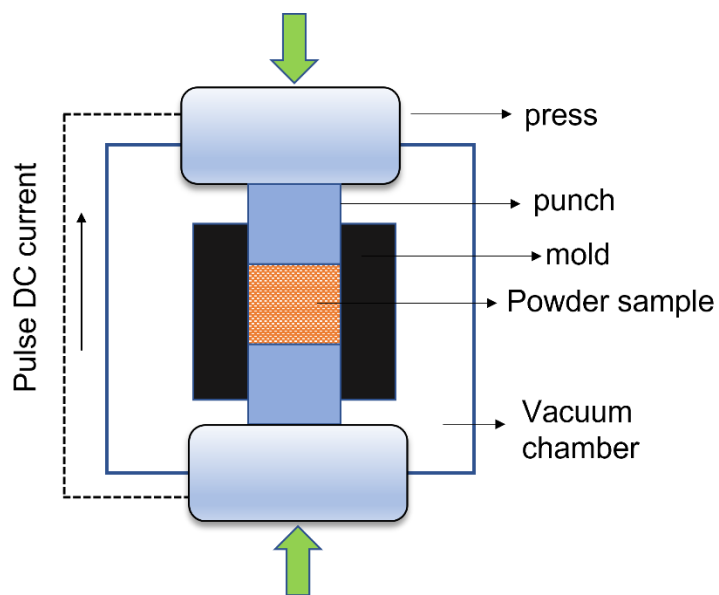

**Figure S13.** Components of SPS apparatus.

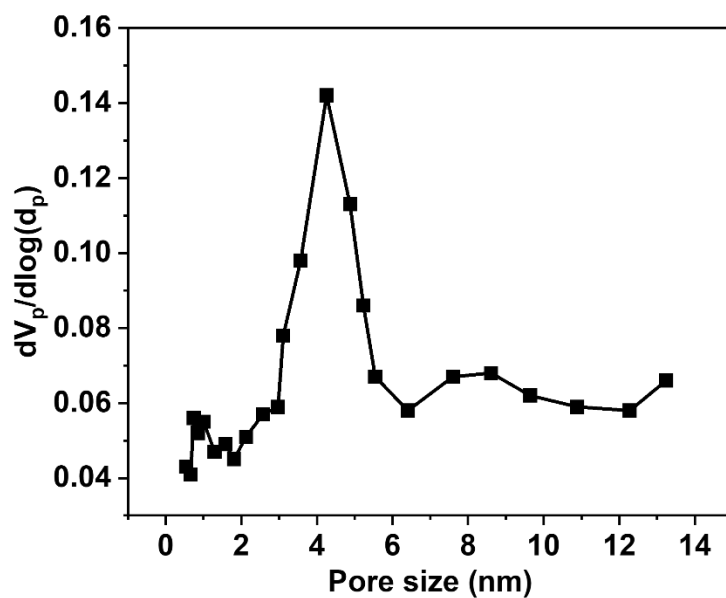

**Figure S14.** Pore size distribution of Zn-MFZS<sup>SPS</sup>.

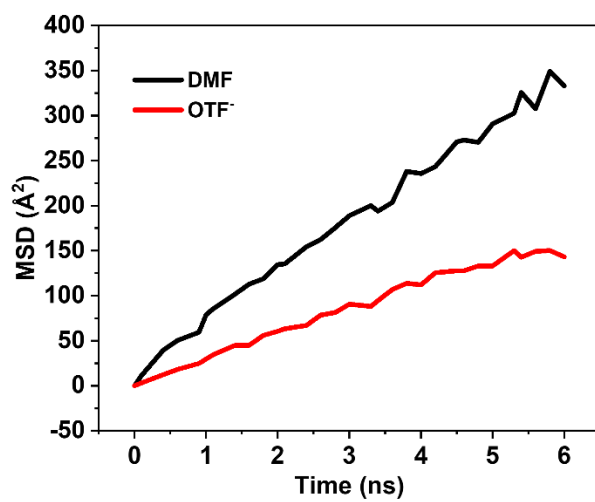

**Figure S15.** MSD of DMF and OTF<sup>-</sup> in fluorine doped ZnS systems with 110 OTF<sup>-</sup> ions + 75

DMF molecules.

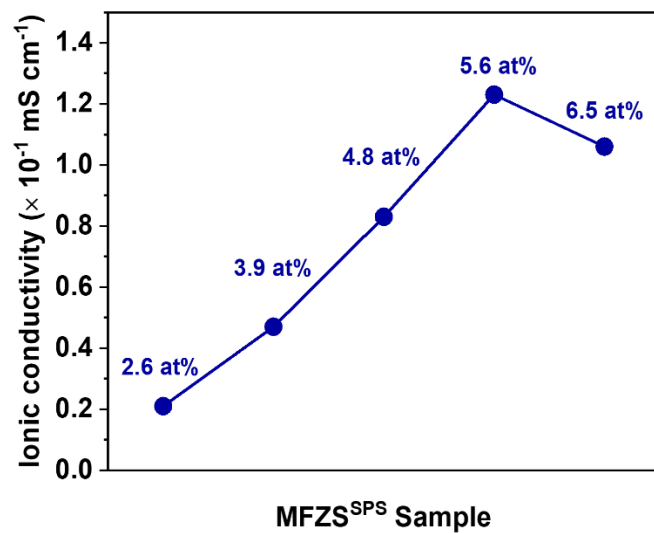

**Figure S16.** Ionic conductivity of MFZS<sup>SPS</sup> with different fluorine doping concentrations.

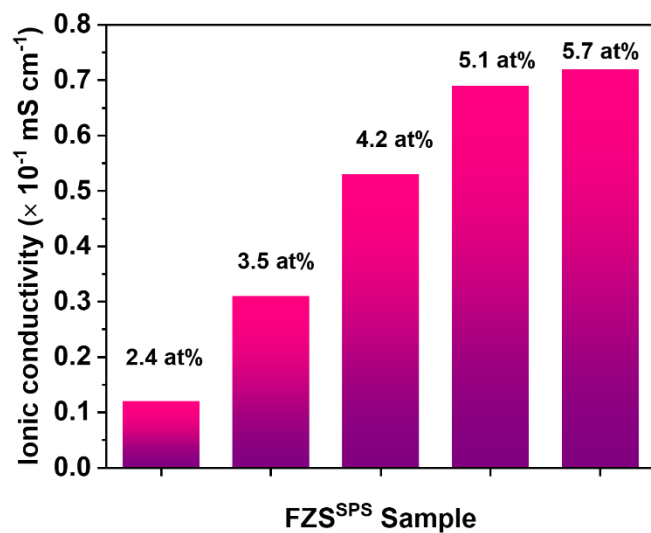

**Figure S17.** Ionic conductivity of FZS<sup>SPS</sup> with different fluorine doping concentrations.

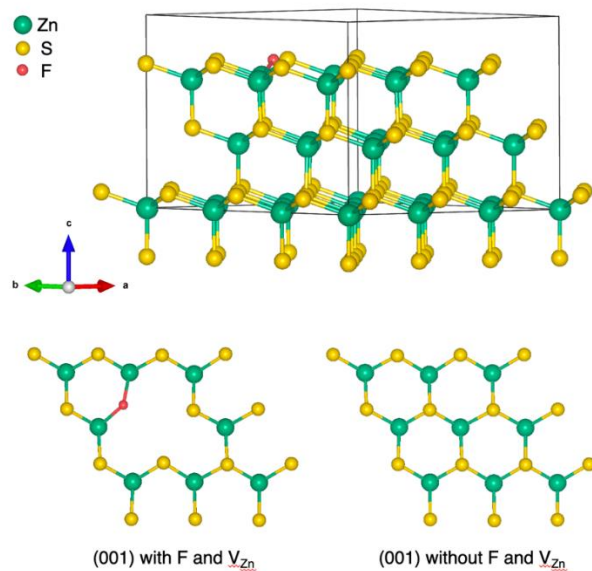

**Figure S18.** The cell model of F-doped ZnS with Zn vacancy ( $V_{Zn}$ ). The (001) planes with and without F and  $V_{Zn}$  are shown in the lower part.

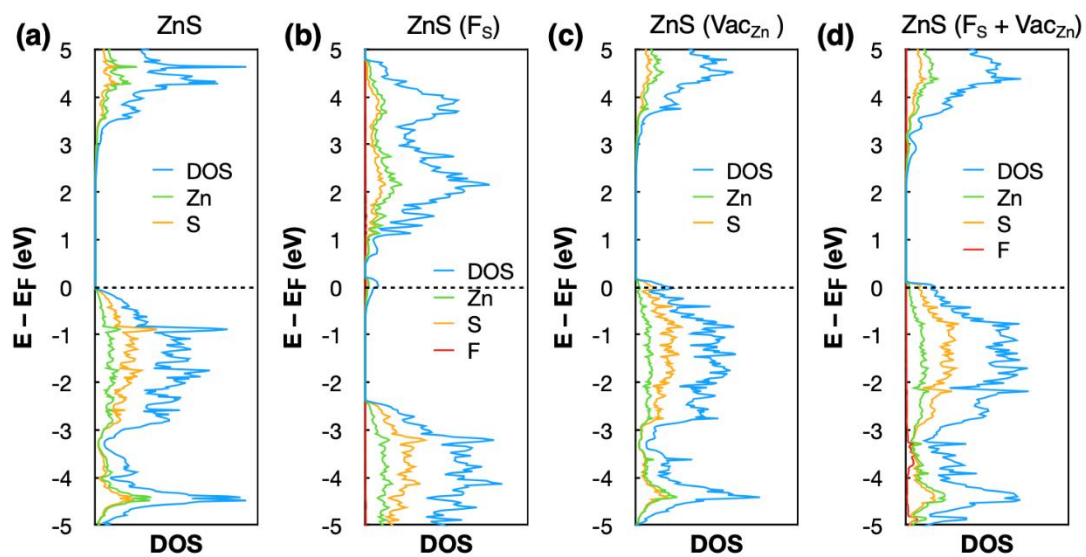

**Figure S19.** The density of states (DOS) for ZnS. (a), ZnS with  $F_S$  (b), or ZnS with  $Vac_{Zn}$  is (c) and ZnS:F (d).

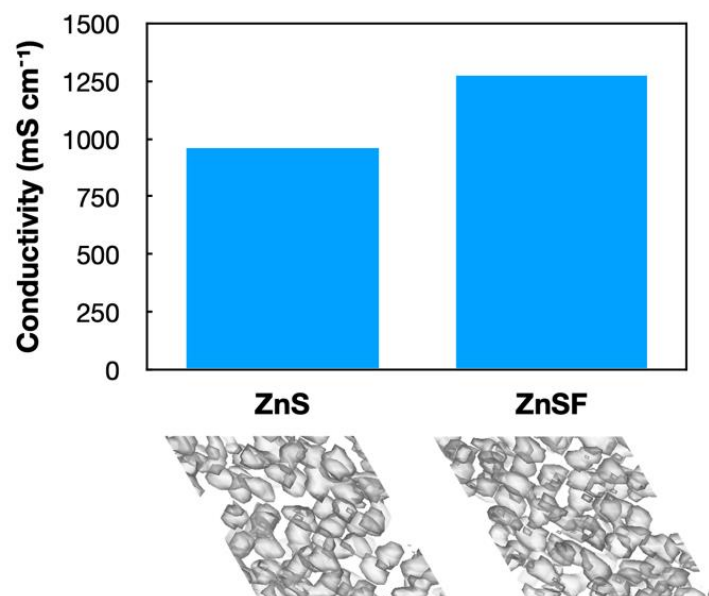

**Figure S20.** The conductivity of ZnS and F-doped ZnS based on AIMD at 900 K. The inset below is the probability density of correlated cell.

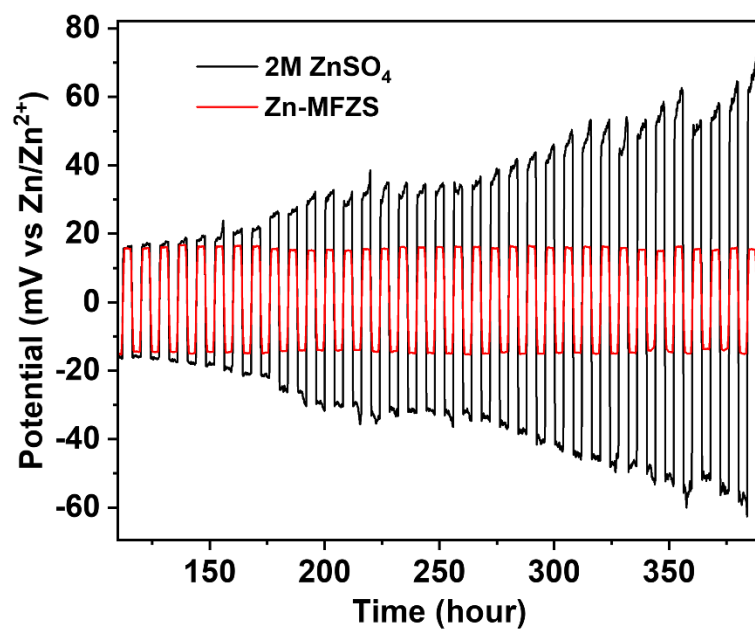

**Figure S21.** Enlarged details of Figure 3a (from 110 to 390 hours).

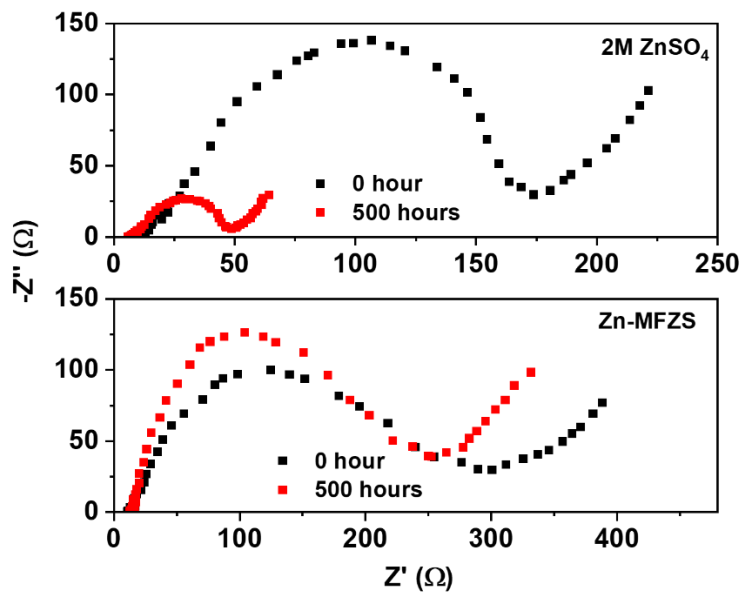

**Figure S22.** Nyquist plots of Zn/Zn symmetric cells with aqueous electrolyte (2M ZnSO<sub>4</sub>) and solid electrolyte (Zn-MFZS) before and after 500 hours cycling.

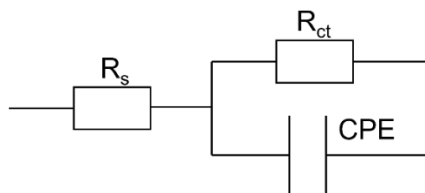

**Figure S23.** Equivalent circuit for the Nyquist plot fitting of symmetrical cells.

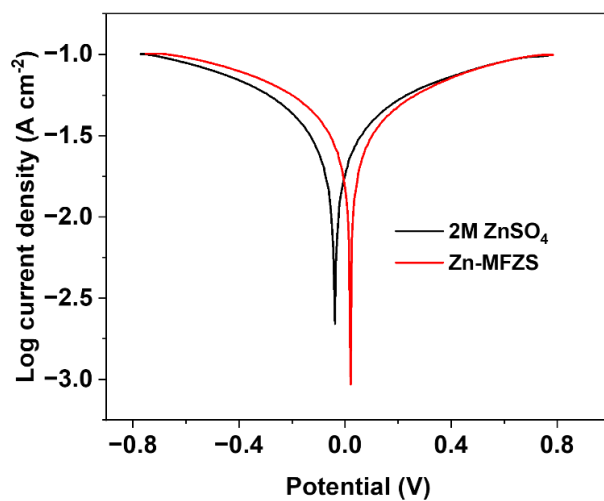



**Figure S24.** Linear polarization curves of Zn/Zn symmetrical cells with aqueous and Zn-MFZS electrolyte.

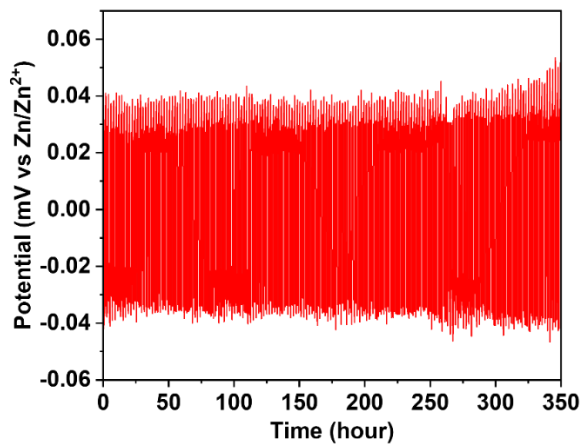

**Figure S25.** Zn plating/stripping performance of Zn/Zn symmetric cell with Zn-MFZS under 10 mA cm<sup>-2</sup> with a 10 mAh cm<sup>-2</sup> per-cycle areal capacity.

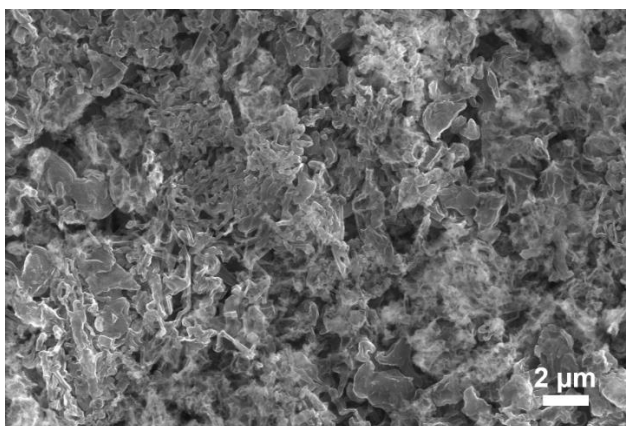

**Figure S26.** SEM images of Zn anode in symmetric cell with Zn-MFZS electrolyte after long-term cycling for 350 hours at 10 mA cm<sup>-2</sup>.

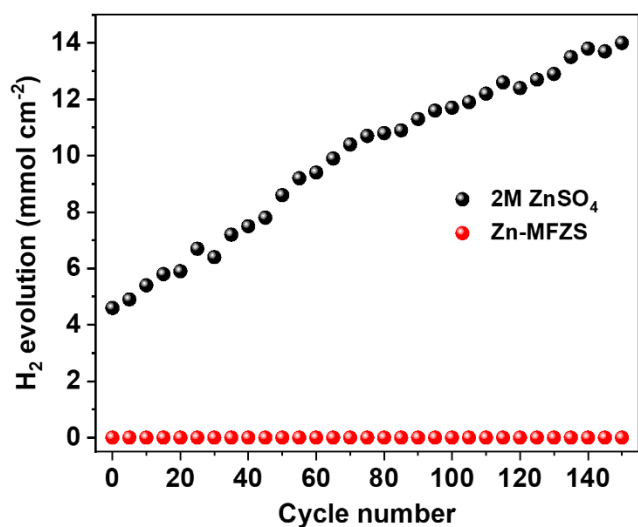

**Figure S27.** Hydrogen production of Zn/Zn symmetric cell with aqueous electrolyte (2M ZnSO<sub>4</sub>) and solid electrolyte (Zn-MFZS) during Zn plating/stripping process at current density of 0.2 mA cm<sup>-2</sup>.

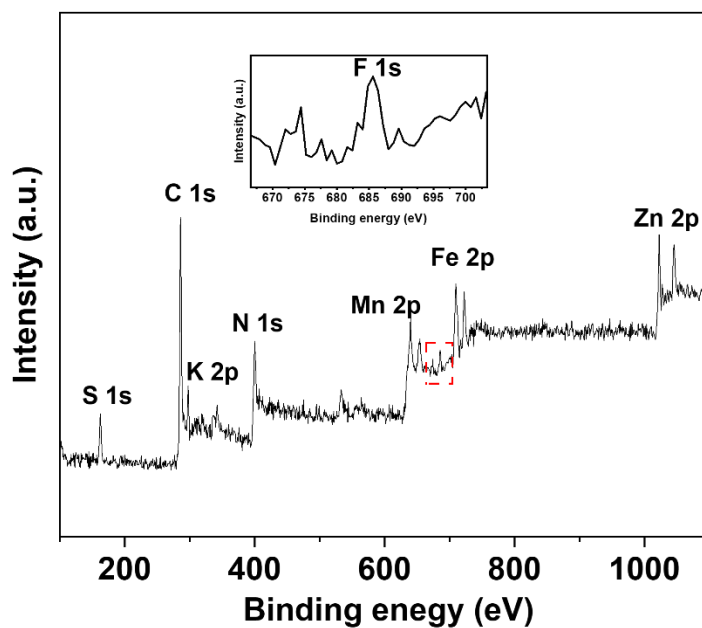

**Figure S28.** XPS survey spectrum of MnHCF grown on MFZS matrix.

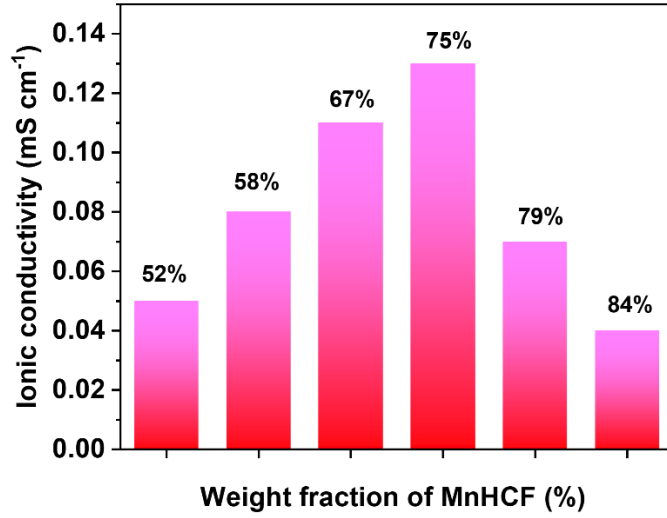

**Figure S29.** The ionic conductivity of MnHCF@Zn-MFZS integrated cathodes with different weight fraction of MnHCF.

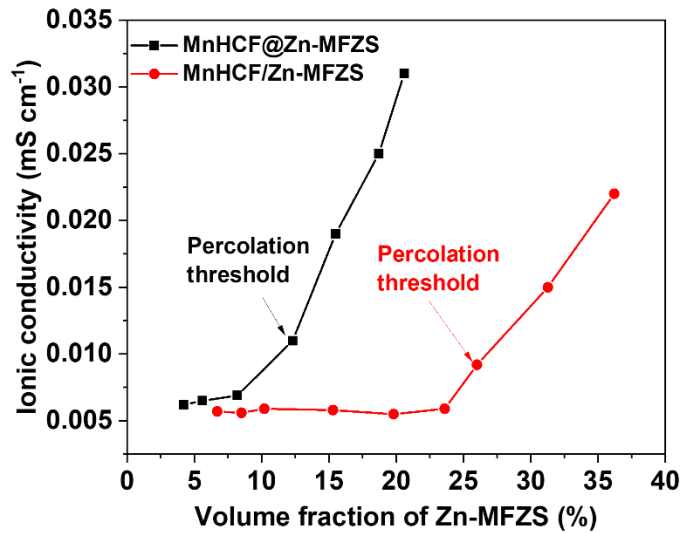

**Figure S30.** Ionic conductivity of MnHCF@Zn-MFZS and MnHCF/Zn-MFZS cathodes made with different amounts of Zn-MFZS to achieve ionic percolation.

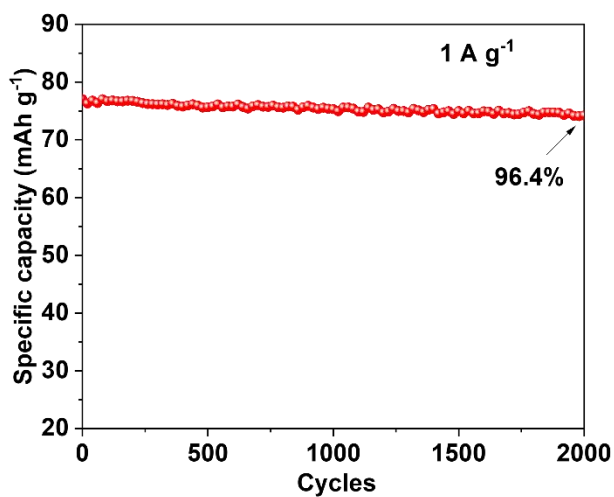

**Figure S31.** Cycling performance of solid ZIB with Zn-MFZS electrolyte at 1 A g<sup>-1</sup>.

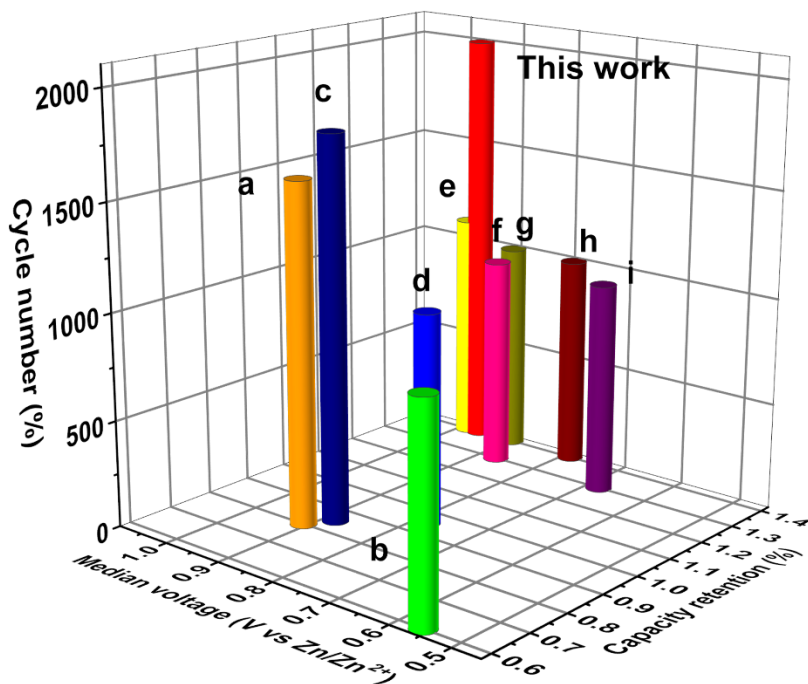

**Figure S32.** Contrast of cycling stability between solid ZIB with Zn-MFZS electrolyte and state-of-the-art optimized aqueous Zn-ion batteries under the same rate (1 A g<sup>-1</sup>): a(Ref.34), b(Ref.39), c(Ref.40), d(Ref.37), e(Ref.35), f(Ref.36), g(Ref.41), h(Ref.33), i(Ref.38).

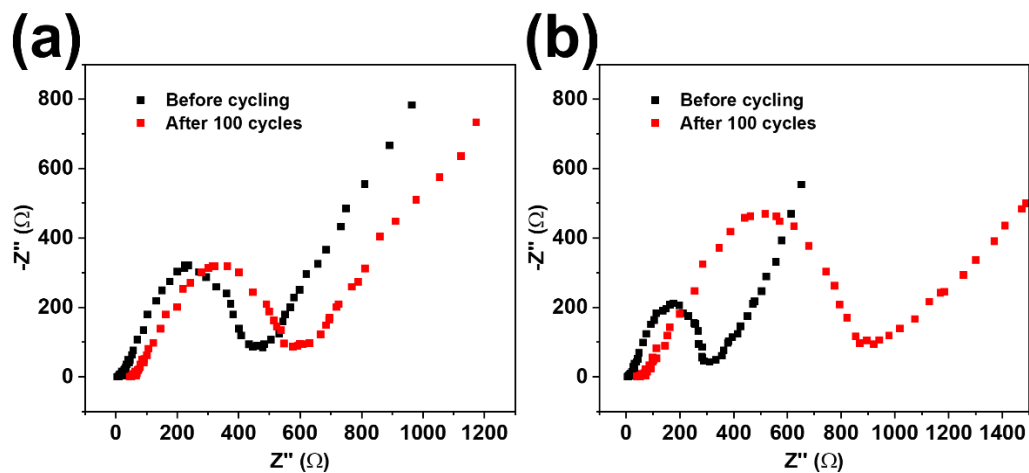

**Figure S33.** Galvanostatic electrochemical impedance spectroscopies in full cells. (a,b) Nyquist plot of full cells with aqueous (a) and Zn-MFZS (b) electrolyte before and after cycling.

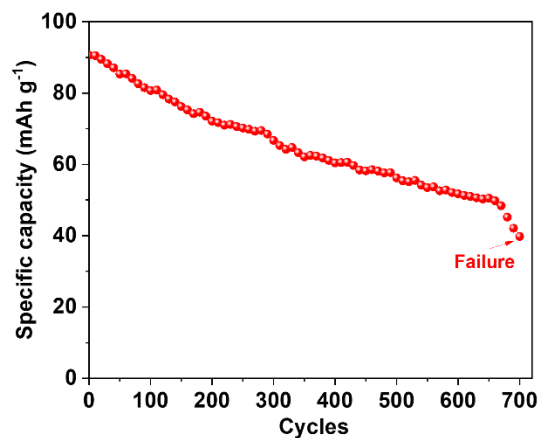

**Figure S34.** Cycling performance of quasi-solid ZIB employing non-mesoporous fluorine doped ZnS as electrolyte (Zn-FZS) and MnHCF@Zn-FZS as cathode, with a DMF concentration over 40 mol% in Zn-FZS.

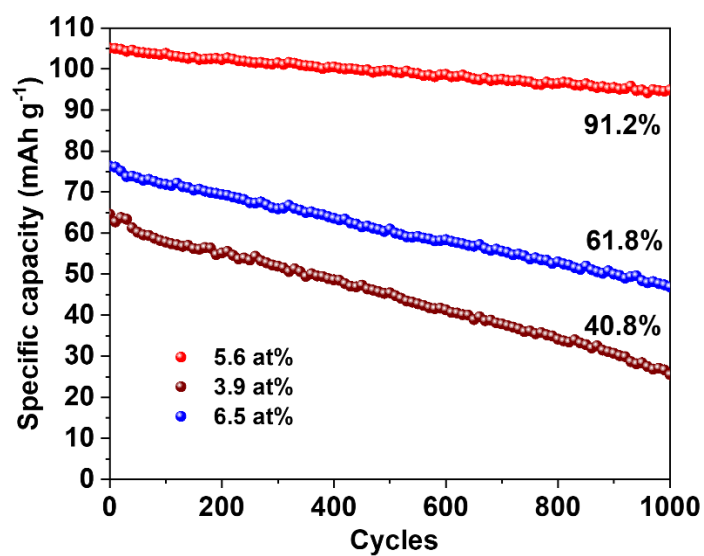

**Figure S35.** Cycling performance of Zn-MFZS based solid ZIB with various fluorine doping concentrations at 1C.

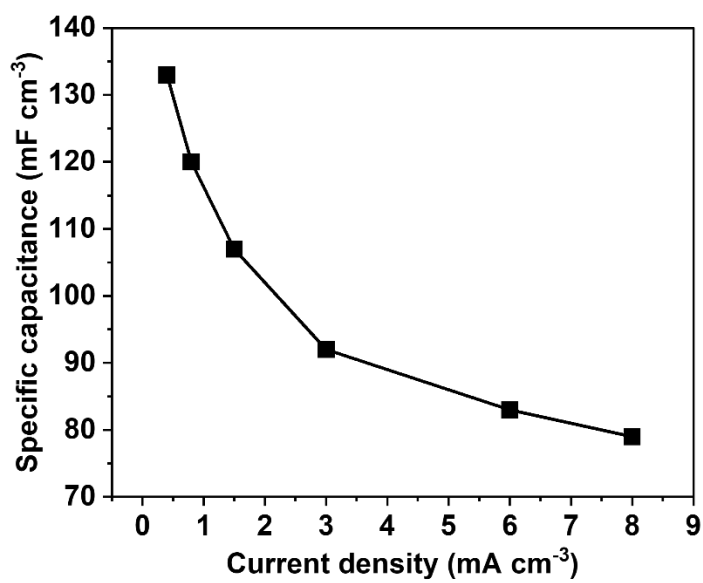

**Figure S36.** Specific capacitance of assembled solid ZIC (NDFLC@Zn-MFZS as positive electrode, Zn-MFZS as solid electrolyte and Zn foil as negative electrode) under different current densities.

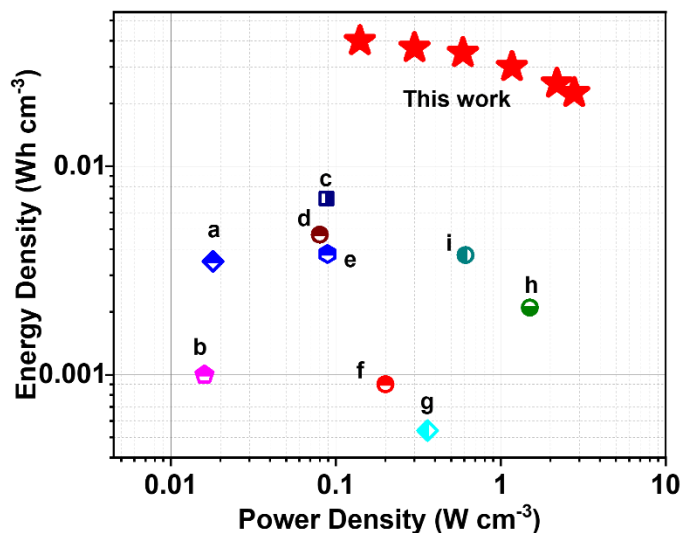

**Figure S37.** Ragone plot of solid ZIC in this work in comparison with some recent reported ZICs: a(Ref.48), b(Ref.49), c(Ref.50), d(Ref.51), e(Ref.52), f(Ref.53), g(Ref.54), h(Ref.55), i(Ref.56).

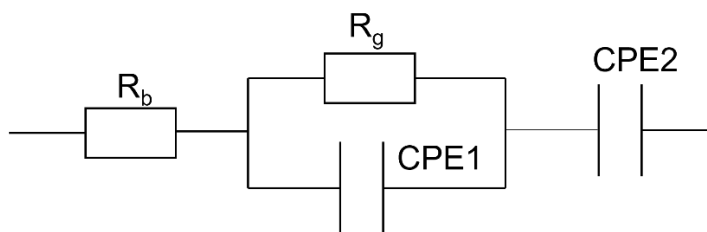

**Figure S38.** Equivalent circuit for the Nyquist plot fitting of Zn-MFZS, Zn-MFZSe and Zn-MFZTe electrolyte.  $R_b$  and  $R_g$  represents the bulk impedance and crystalline grain impedance, respectively.

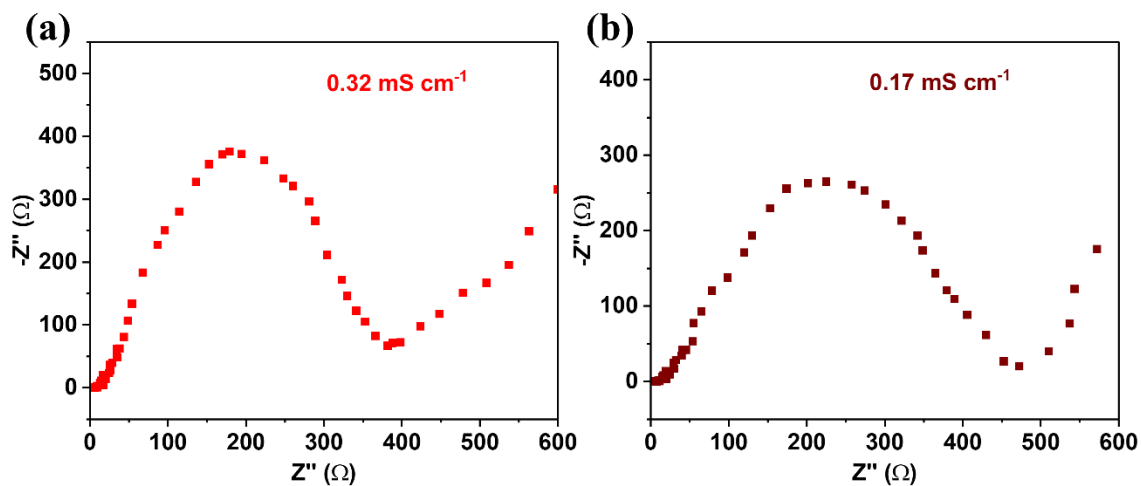

**Figure S39.** Galvanostatic electrochemical impedance spectroscopies of Zn-MFZSe and Zn-MFZTe electrolyte. (a,b) Nyquist plot of Zn-MFZSe (a) and Zn-MFZTe (b) at 25°C.

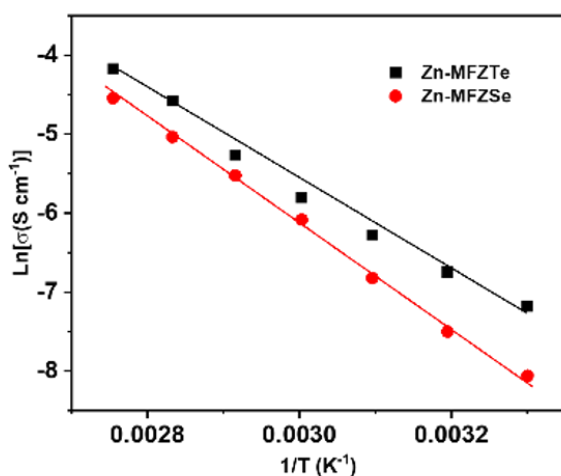

**Figure S40.** Temperature-dependent conductivity of Zn-MFZSe and Zn-MFZTe with linear fitting according to the Arrhenius equation.

**Table S1** Refined structural parameters for MFZS from X-ray diffraction data

| Atom | Wyckoff position | x    | y    | z    | Occupies |
|------|------------------|------|------|------|----------|
| Zn   | 4a               | 0    | 0    | 0    | 0.868    |
| S    | 4d               | 0.25 | 0.25 | 0.75 | 0.913    |
| F    | 4d               | 0.25 | 0.25 | 0.75 | 0.015    |



**Table S2.** Lattice parameters and crystallite size of MFZS samples with different fluorine doping concentration.

| Fluorine (at%) <sup>a</sup> | Lattice parameters |        |        |                   | Crystallite size (nm) |
|-----------------------------|--------------------|--------|--------|-------------------|-----------------------|
|                             | a(Å)               | b(Å)   | c(Å)   | V(Å) <sup>3</sup> |                       |
| 0                           | 5.3702             | 5.3702 | 5.3702 | 154.87            | 207                   |
| 2.6                         | 5.3621             | 5.3621 | 5.3621 | 154.17            | 205                   |
| 3.9                         | 5.3545             | 5.3545 | 5.3545 | 153.52            | 196                   |
| 4.8                         | 5.3436             | 5.3436 | 5.3436 | 152.58            | 194                   |
| 5.6                         | 5.3361             | 5.3361 | 5.3361 | 151.94            | 193                   |
| 6.5                         | 5.3308             | 5.3308 | 5.3308 | 151.49            | 190                   |

<sup>a</sup> Obtained from XPS analysis

**Table S3.** Fluorine distribution and porosity various MFZS samples

| Fluorine (at.%) <sup>a</sup> | %F <sub>sur</sub> | %F <sub>sub</sub> | S <sub>BET</sub> (m <sup>2</sup> g <sup>-1</sup> ) <sup>b</sup> | Pore size (nm) <sup>b</sup> |
|------------------------------|-------------------|-------------------|-----------------------------------------------------------------|-----------------------------|
| 2.6                          | 0.1               | 2.5               | 242                                                             | 4.42                        |
| 3.9                          | 0.3               | 3.6               | 224                                                             | 4.51                        |
| 4.8                          | 0.4               | 4.4               | 263                                                             | 4.33                        |
| 5.6                          | 0.6               | 5.0               | 257                                                             | 4.58                        |
| 6.5                          | 1.6               | 4.9               | 219                                                             | 4.24                        |

<sup>a</sup> Obtained from XPS analysis

<sup>b</sup> Obtained from nitrogen sorption isotherm

**Table S4.** Diffusion coefficients ( $\times 10^{-7}$  cm<sup>2</sup> s<sup>-1</sup>) of Zn<sup>2+</sup>, OTF<sup>-</sup> and DMF in different fluorine doped ZnS systems

| Systems                     | Zn <sup>2+</sup> | OTF <sup>-</sup> | DMF  |
|-----------------------------|------------------|------------------|------|
| 0 OTF <sup>-</sup> +0 DMF   | 0.12             | N/A              | N/A  |
| 110 OTF <sup>-</sup> +0 DMF | 0.47             | 0.51             | N/A  |
| 110 OTF <sup>-</sup> +75DMF | 1.10             | 1.22             | 9.25 |

<sup>a</sup> The diffusion coefficient  $D$  is calculated by  $D=MSD/6t$ , where the MSD values are taken from MSD plots of various systems (e.g. Figure S11), and  $t$  is the simulation time.

**Table S5.** Comparison between calculated F-doped ZnS and  $3 \times 3 \times 1$  ZnS supercell parameters.

| Parameters   | F-doped ZnS | ZnS      |
|--------------|-------------|----------|
| $a$ (Å)      | 11.55601    | 11.56177 |
| $b$ (Å)      | 11.55601    | 11.56177 |
| $c$ (Å)      | 9.37543     | 9.44014  |
| $\alpha$ (°) | 89.7008     | 90.0000  |
| $\beta$ (°)  | 90.2992     | 90.0000  |
| $\gamma$ (°) | 120.5371    | 120.0000 |

**Table S6.** Fitting result for the Nyquist plot of aqueous and Zn-MFZS based Zn/Zn symmetric cells before and after cycling (Figure SX)

| Sample                                                 | $R_s$ ( $\Omega$ ) | $R_{ct}$ ( $\Omega$ ) | CPE   |
|--------------------------------------------------------|--------------------|-----------------------|-------|
| Aqueous Zn/Zn symmetric cell                           | 12.67              | 154.36                | 37.21 |
| Aqueous Zn/Zn symmetric cell (500 hours cycling)       | 7.34               | 47.28                 | 33.65 |
| Zn-MFZS based Zn/Zn symmetric cell                     | 14.51              | 247.18                | 29.72 |
| Zn-MFZS based Zn/Zn symmetric cell (500 hours cycling) | 13.65              | 226.54                | 26.39 |

**Table S7.** Gas flow conditions and corresponding material properties of various NDFLC@Zn-MFZS samples

| Sample | Flow concentration (sccm) |                 |                |                 | Material Properties               |                              |                                           |                                                |
|--------|---------------------------|-----------------|----------------|-----------------|-----------------------------------|------------------------------|-------------------------------------------|------------------------------------------------|
|        | Ar                        | CH <sub>4</sub> | H <sub>2</sub> | NH <sub>4</sub> | Carbon content (wt%) <sup>a</sup> | N content (at%) <sup>b</sup> | Ionic conductivity (mS cm <sup>-1</sup> ) | Electrical conductivity (mS cm <sup>-1</sup> ) |
| S1     | 300                       | 10              | 20             | 20              | 12.7                              | 3.6                          | 0.026                                     | 0.0217                                         |
| S2     | 300                       | 10              | 20             | 40              | 14.3                              | 5.2                          | 0.049                                     | 0.0531                                         |
| S3     | 300                       | 10              | 20             | 60              | 16.8                              | 7.4                          | 0.088                                     | 0.0772                                         |
| S4     | 300                       | 10              | 20             | 80              | 15.4                              | 8.7                          | 0.132                                     | 0.0919                                         |
| S5     | 300                       | 10              | 20             | 100             | 17.5                              | 9.2                          | 0.161                                     | 0.1038                                         |
| S6     | 300                       | 20              | 20             | 100             | 26.3                              | 8.8                          | 0.154                                     | 0.1054                                         |
| S7     | 300                       | 40              | 20             | 100             | 38.2                              | 7.5                          | 0.086                                     | 0.2178                                         |
| S8     | 300                       | 60              | 20             | 100             | 47.8                              | 6.4                          | 0.052                                     | 0.3802                                         |
| S9     | 300                       | 80              | 20             | 100             | 56.5                              | 5.1                          | 0.043                                     | 0.3391                                         |
| S10    | 300                       | 100             | 20             | 100             | 71.7                              | 3.9                          | 0.028                                     | 0.3062                                         |

<sup>a</sup> Determined from TGA

<sup>b</sup> Based on XPS analysis

**Table S8.** Fitting result for the Nyquist plot of Zn-MFZS, Zn-MFZSe and Zn-MFZTe electrolyte (Figure S8 and S38).

| Sample   | R <sub>b</sub> (Ω) | R <sub>g</sub> (Ω) | CPE1  | CPE2  |
|----------|--------------------|--------------------|-------|-------|
| Zn-MFZS  | 5.36               | 342.34             | 0.387 | 11.36 |
| Zn-MFZSe | 4.29               | 382.71             | 0.672 | 19.72 |
| Zn-MFZTe | 7.92               | 451.27             | 0.327 | 27.42 |
